# Supplementary material
Source: MDPI journal article supplement (https://www.mdpi.com/2673-9976/20/1/17)
Supplement: s1 [file s1]

**IECBM**  
**2022**

# The 2nd International Electronic Conference on Biomolecules: BIOMACROMOLECULES AND THE MODERN WORLD CHALLENGES

01-15 NOVEMBER 2022 | ONLINE

Presented By,

Akhila P P

Research Scholar

Supervisor: Dr. K V Sunooj

Department of Food Science And Technology

Pondicherry University

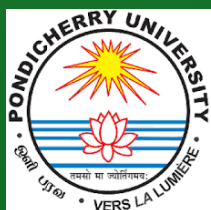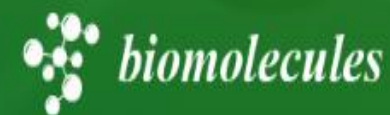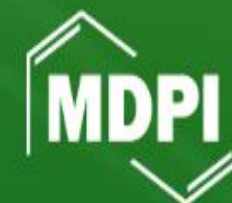

**The effect of heat-moisture treatment (HMT) on the structural, functional properties and digestibility of citric acid-modified *Plectranthus rotundifolius* (Hausa potato) starch**

# Introduction

- ❖ Starch is a naturally abundant biopolymer found in the plant
- ❖ Hausa potato (*Plectranthus rotundifolius*) tuber is a non-conventional source of starch.
- ❖ Starch has been modified to achieve its industrial need by physical, chemical, and enzymatic methods.
- ❖ HMT is the cheapest method that alters the crystalline and amorphous area of starch by treating it at high temperature (90–120 °C) with a moisture content of 20–35 % for a specific period to starch
- ❖ Citric acid esterification promotes the usage of green chemicals and confers unique physicochemical properties to starches

# Objectives

- ❖ To isolate Hausa potato starch from Hausa potato (*Plectranthus rotundifolius*)
- ❖ To modify the Hausa potato starch by HMT and citric acid
- ❖ To dual modify the Hausa potato starch by HMT-citric acid.
- ❖ To study the physicochemical characterization of modified starch

The background features abstract, overlapping green geometric shapes in various shades, including dark forest green, medium green, and light lime green. These shapes are primarily located on the right side of the slide, with some extending towards the center. A thin, light gray line runs diagonally across the lower right portion of the slide.

## Plan of work

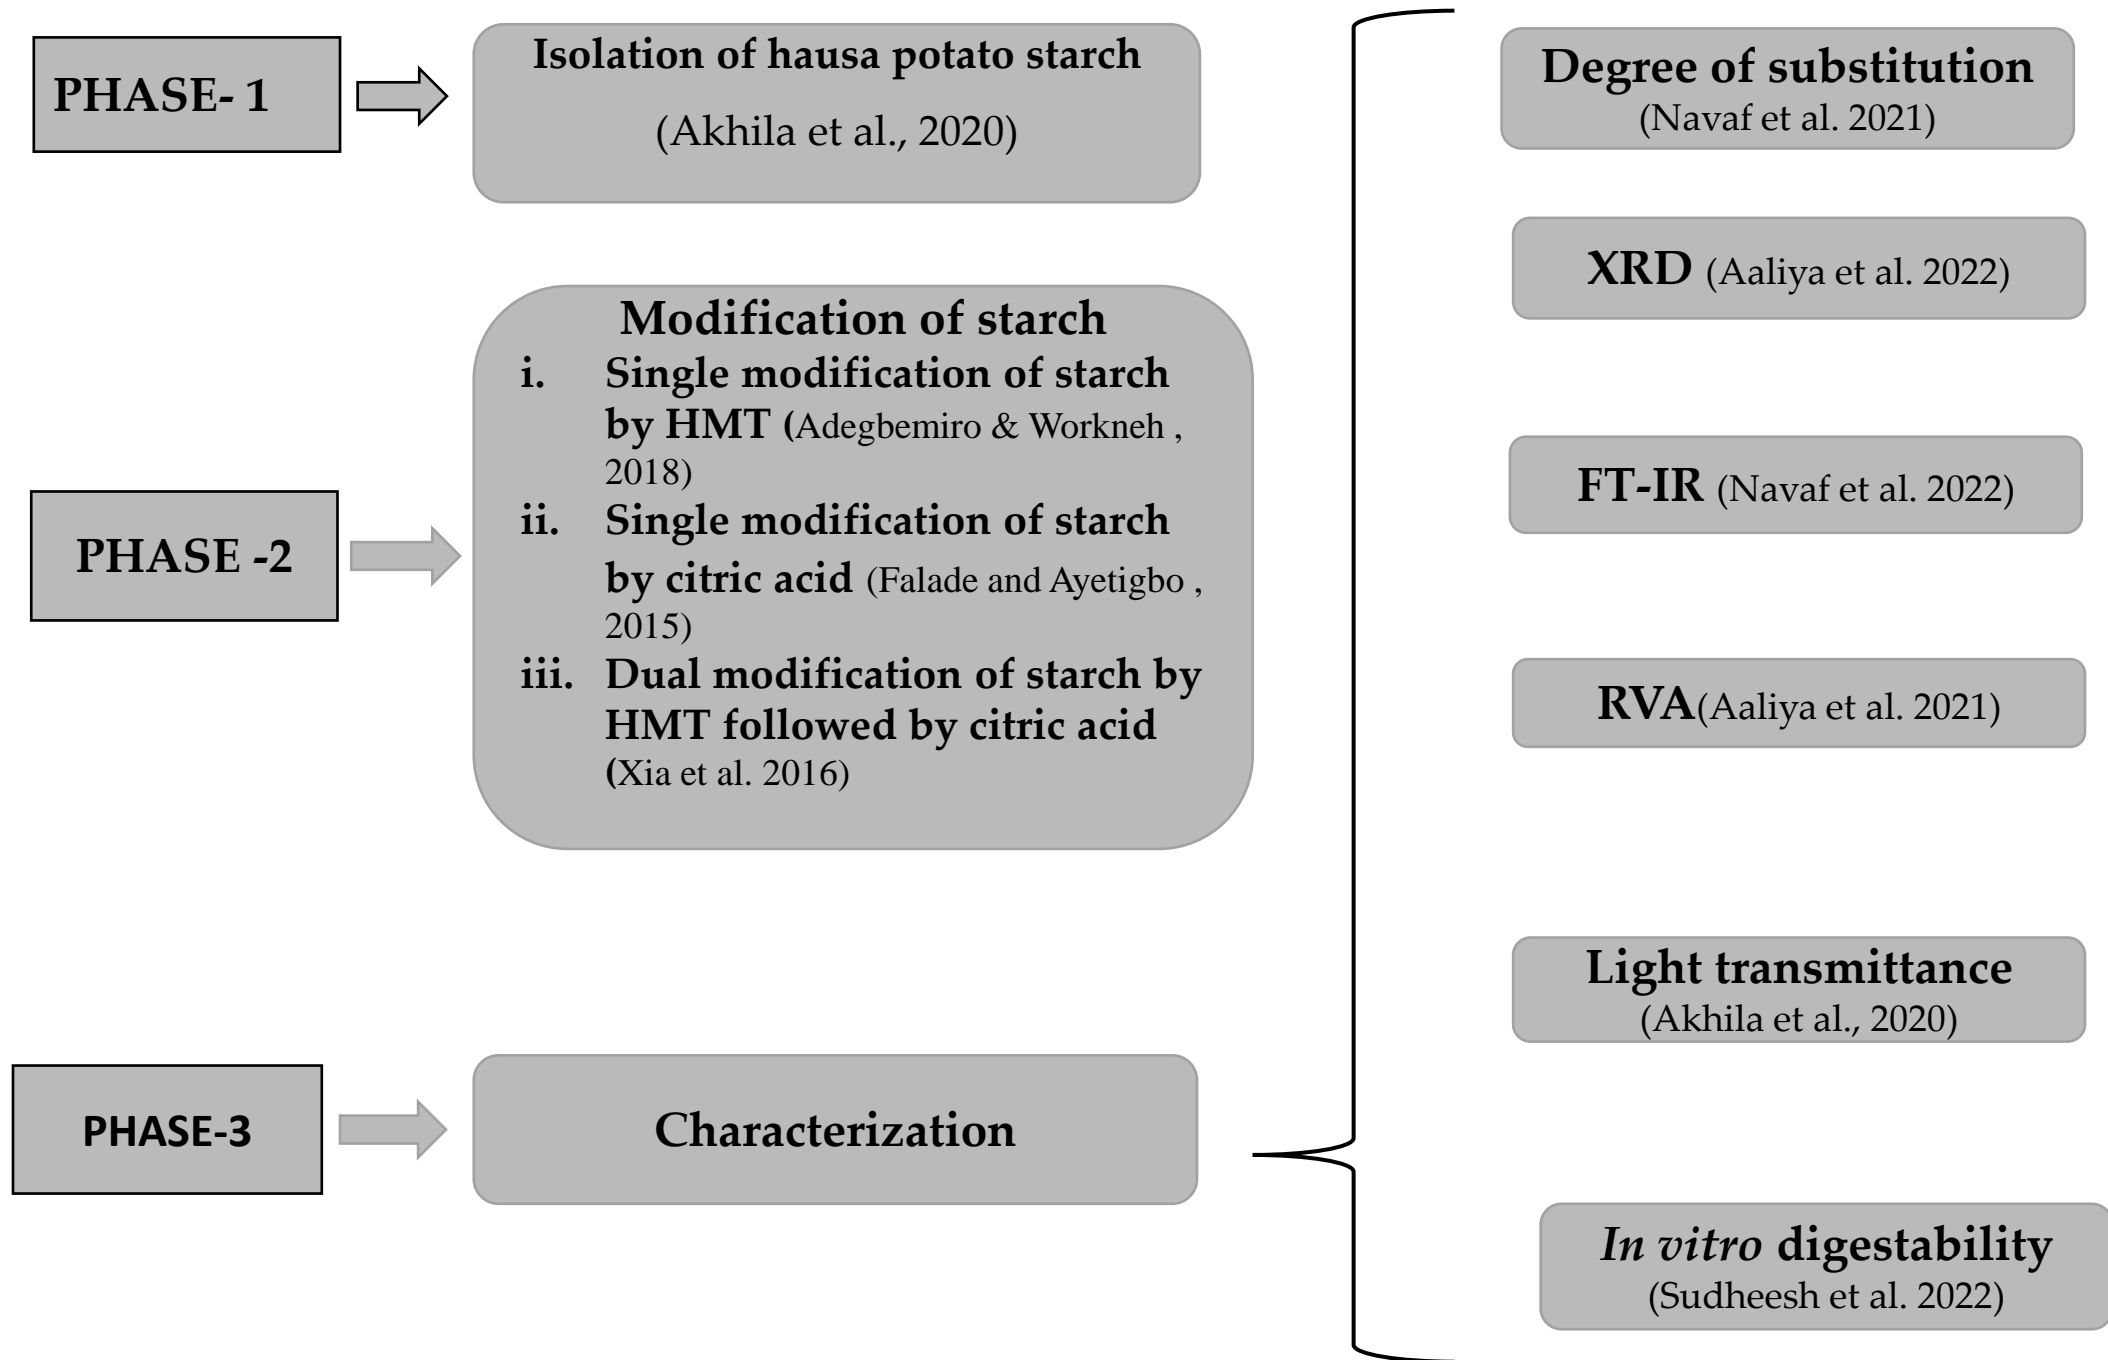

## **Result and discussion**

## Degree of substitution

| Samples | Degree of substitution |
|---------|------------------------|
| HNS     | --                     |
| HHM     | --                     |
| HCA     | $0.112 \pm 0.013^a$    |
| HHC     | $0.135 \pm 0.051^b$    |

HNS- native Hausa potato starch, HHM- HMT modified Hausa potato starch, HCA- citric acid modified Hausa potato starch, HHC- HMT-citric acid-modified Hausa potato starch.

- ❖ The DS describes the number of substituted functional groups that exist per unit of anhydrous glucose.
- ❖ HHC showed a significantly ( $p \leq 0.05$ ) higher DS compared to HCA



## X-ray diffraction and relative crystallinity

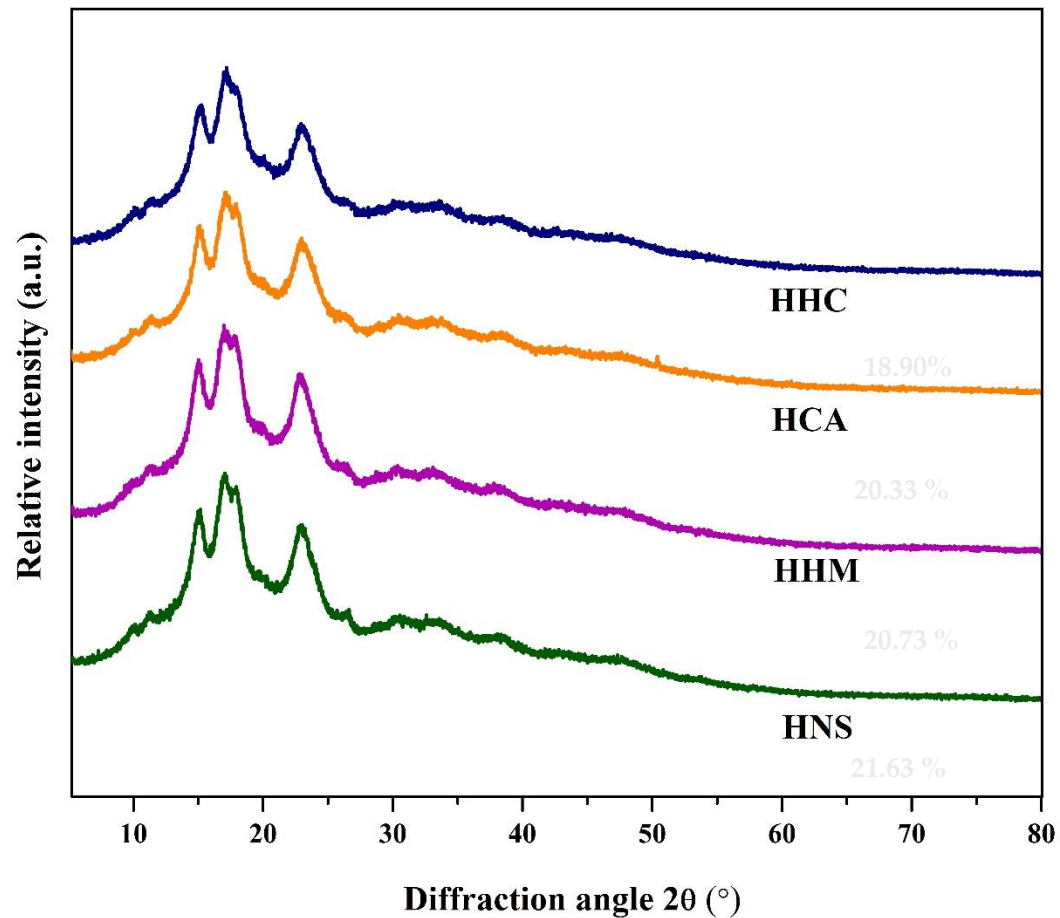

| Samples | Relative crystallinity (%) |
|---------|----------------------------|
| HNS     | $21.63 \pm 0.21^d$         |
| HHM     | $20.73 \pm 0.15^c$         |
| HCA     | $20.33 \pm 0.06^b$         |
| HHC     | $18.90 \pm 0.08^a$         |

- ❖ A-type diffraction pattern
- ❖ All modification significantly decreases the RC %

## Fourier transform infrared spectroscopy (FT-IR)

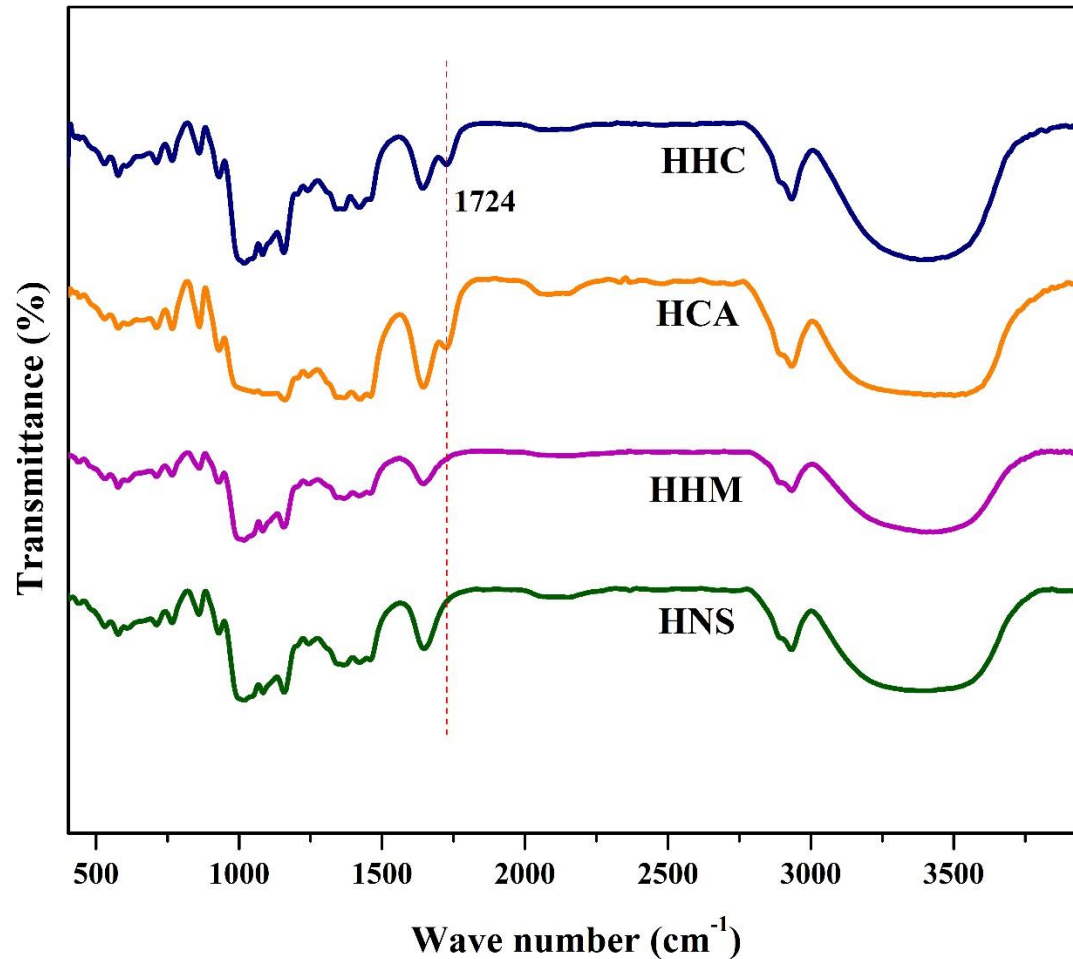

- ❖ Hausa potato starch showed Major peaks including  
O-H group broad peak at  $3365\text{ cm}^{-1}$   
C-H<sub>2</sub> group  $2931\text{ cm}^{-1}$   
H-O-H bending vibration at  $1646\text{ cm}^{-1}$
- ❖ The peaks at  $921\text{ cm}^{-1}$ ,  $1018\text{ cm}^{-1}$ ,  $1084\text{ cm}^{-1}$ , and  $1160\text{ cm}^{-1}$ , representing the contraction and expansion of the C-O-C bond in the glucose pyranose ring
- ❖ HCA and HHC exhibited a new peak at  $1724\text{ cm}^{-1}$ , representing the C=O stretching group

## Thermal properties

| Samples | T <sub>o</sub> (°C)       | T <sub>p</sub> (°C)       | T <sub>c</sub> (°C)       | ΔH (J/g)                  |
|---------|---------------------------|---------------------------|---------------------------|---------------------------|
| HNS     | 68.18 ± 0.02 <sup>a</sup> | 73.04 ± 0.19 <sup>a</sup> | 88.23 ± 0.03 <sup>a</sup> | 11.12 ± 0.15 <sup>d</sup> |
| HHM     | 68.89 ± 0.10 <sup>b</sup> | 74.22 ± 0.23 <sup>b</sup> | 89.41 ± 0.19 <sup>b</sup> | 10.78 ± 0.02 <sup>c</sup> |
| HCA     | 69.53 ± 0.06 <sup>c</sup> | 74.81 ± 0.04 <sup>c</sup> | 90.22 ± 0.07 <sup>c</sup> | 8.76 ± 0.09 <sup>b</sup>  |
| HHC     | 70.18 ± 0.15 <sup>d</sup> | 75.06 ± 0.07 <sup>d</sup> | 90.94 ± 0.04 <sup>d</sup> | 6.57 ± 0.05 <sup>a</sup>  |

- ❖ After citric acid treatment, the enthalpy of gelatinization was significantly reduced ( $p \leq 0.05$ ) and increased gelatinization transition temperature for HCA and HHC.

## Pasting profile

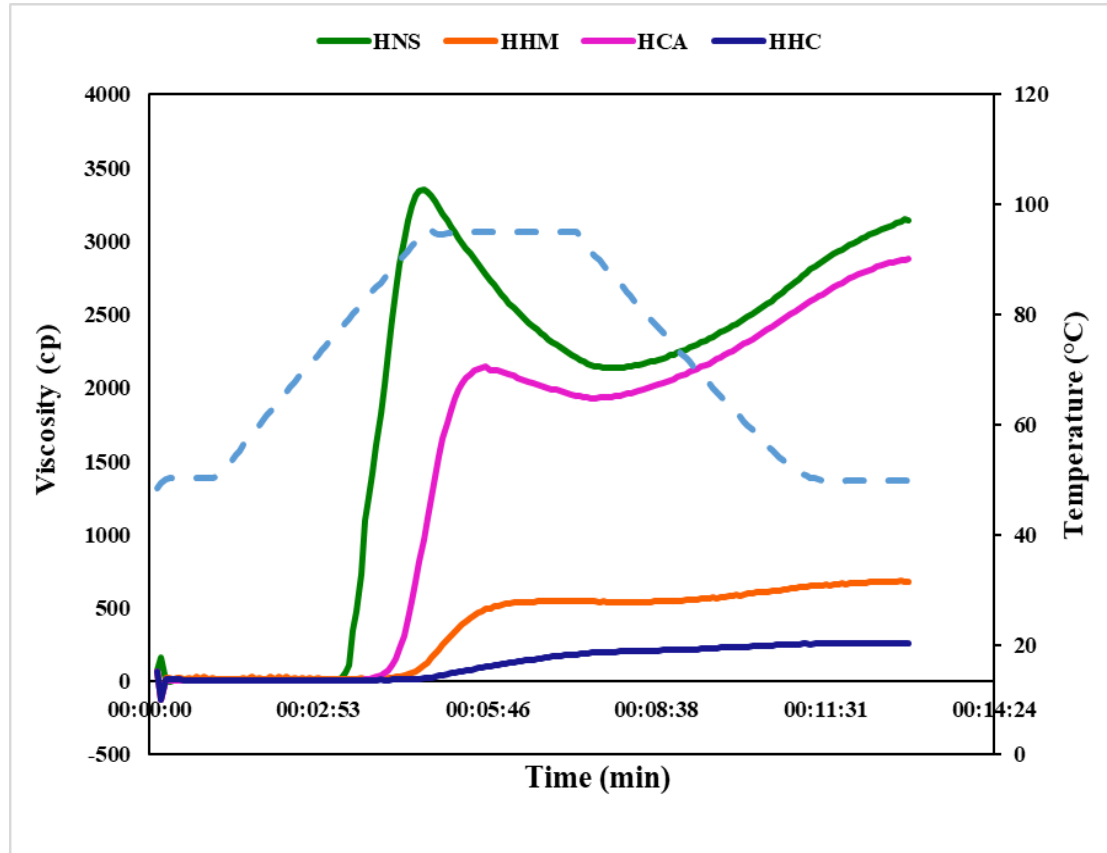

- ❖ Native Hausa potato starch exhibited remarkably higher ( $p \leq 0.05$ ) peak, breakdown, final, and setback viscosities than modified starches.
- ❖ HHM starches had a higher PT (85.8 °C) than HNS starches (78.40 °C).
- ❖ The substitution of citrate prevents starch from swelling and gelatinizing during RVA analysis in HCA and HHC samples

## Light transmittance

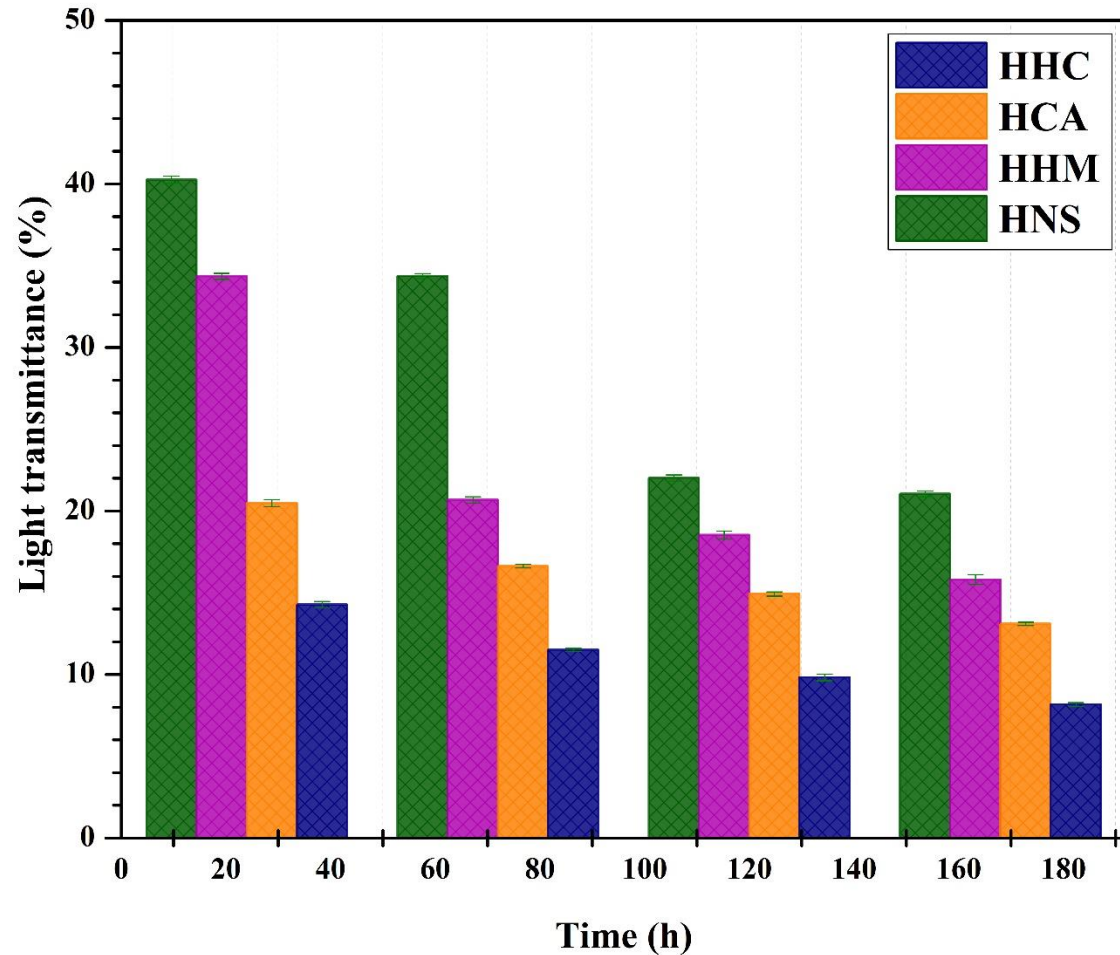

- ❖ All the Hausa potato starch samples showed a decreased light transmittance percentage with storage time due to the turbidity formation in the starch gel
- ❖ The HHC samples exhibited the lowest light transmittance among the samples due to the higher number of bulkier citrate group

## *In vitro* digestibility

| Samples | RDS (%)                   | SDS (%)                   | RS (%)                    |
|---------|---------------------------|---------------------------|---------------------------|
| HNS     | 29.31 ± 0.24 <sup>d</sup> | 33.61 ± 0.15 <sup>a</sup> | 37.07 ± 0.11 <sup>a</sup> |
| HHM     | 26.12 ± 0.12 <sup>c</sup> | 34.03 ± 0.08 <sup>b</sup> | 39.82 ± 0.15 <sup>b</sup> |
| HCA     | 25.24 ± 0.18 <sup>b</sup> | 34.89 ± 0.09 <sup>c</sup> | 40.12 ± 0.21 <sup>c</sup> |
| HHC     | 20.16 ± 0.11 <sup>a</sup> | 36.10 ± 0.14 <sup>d</sup> | 44.05 ± 0.03 <sup>d</sup> |

- ❖ Retrogradation mechanism by purposeful alteration or processing of the HHM led to a significantly higher RS compared to HNS
- ❖ Citric acid-modified starches, HCA and HHC showed improved SDS and RS and a decrease in RDS
- ❖ Crosslinking and steric hindrance of the bulker citrate group led to resistance to the enzymatic hydrolysis, thereby increasing digestion time and high RS and SDS percentage



**Conclusion**

- ❖ The study of Hausa potato starch properties was affected differently by HMT, citric acid, and dual-modified starches.
- ❖ DS, thermal analysis, and FT-IR study suggested that citrate esterification significantly improved by HMT in HHC.
- ❖ The citrate esterified single and dual modified samples had a lower enthalpy of gelatinization, and light transmittance than that of native and HMT-modified starches.
- ❖ Reduced viscosities resulting from all the starch modifications are significant quality considerations that can encourage their use in processed meats, sweets, and imitation cheese.
- ❖ The study enables safe and green modification of starches with improved characteristics and can be easily applied in food and pharmaceutical.
- ❖ The increased DS and RS content of the HHC suggests that the HMT served as a pre-treatment and favored the production of the citrate starch. The dual-modified Hausa potato having a high amount of RS can easily be exploited in food and non-food sectors.



# References

1. Adegbeiro, B., & Workneh, T. S. (2018). Structural and physicochemical properties of heat moisture treated and citric acid modified acha and iburu starches. *Food Hydrocolloids*, 81, 449–455. <https://doi.org/10.1016/j.foodhyd.2018.03.027>
2. Akhila, P. P., Sunooj, K. V., Aaliya, B., Navaf, M., Sudheesh, C., Yadav, D. N., Khan, M. A., Mir, S. A., & George, J. (2022). Morphological, physicochemical, functional, pasting, thermal properties, and digestibility of Hausa potato ( *Plectranthus rotundifolius* ) flour and starch. *Applied Food Research*, 2(2), 100193. <https://doi.org/10.1016/j.afres.2022.100193>
3. Aaliya, B., Sunooj, K. V., Rajkumar, C. B. S., & Navaf, M. (2021). Effect of Thermal Pretreatments on Phosphorylation of *Corypha umbraculifera* L. Stem Pith Starch: A Comparative Study Using Dry-Heat, Heat-Moisture and Autoclave Treatments. *Polymers*, 13(21), 3855. <https://doi.org/https://doi.org/10.3390/polym13213855>
4. Falade, K. O., & Ayetigbo, O. E. (2015). Effects of annealing, acid hydrolysis and citric acid modifications on physical and functional properties of starches from four yam (*Dioscorea* spp.) cultivars. *Food Hydrocolloids*, 43, 529–539. <https://doi.org/10.1016/j.foodhyd.2014.07.008>
5. Xia, H., Li, Y., & Gao, Q. (2016). Preparation and properties of RS4 citrate sweet potato starch by heat- moisture treatment. *Food Hydrocolloids*, 55, 172–178. <https://doi.org/10.1016/j.foodhyd.2015.11.008>

6. Aaliya, B., Sunooj, K. V., Rajkumar, C. B. S., Navaf, M., Akhila, P. P., Sudheesh, C., George, J., & Lackner, M. (2021). Effect of Thermal Pretreatments on Phosphorylation of *Corypha umbraculifera* L. Stem Pith Starch: A Comparative Study Using Dry-Heat, Heat-Moisture and Autoclave Treatments. *Polymers*, 13(21), 3855. <https://doi.org/10.3390/polym13213855>
7. Navaf, M., Sunooj, K. V., Aaliya, B., Sudheesh, C., Akhila, P. P., Sabu, S., Sasidharan, A., & George, J. (2021). Talipot palm (*Corypha umbraculifera* L.) a nonconventional source of starch: Effect of citric acid on structural, rheological, thermal properties and in vitro digestibility. *International Journal of Biological Macromolecules*, 182, 554–563. <https://doi.org/10.1016/j.ijbiomac.2021.04.035>
8. Navaf, M., Sunooj, K. V., Aaliya, B., Sudheesh, C., Akhila, P. P., Sabu, S., Sasidharan, A., & George, J. (2022). Impact of gamma irradiation on structural , thermal , and rheological properties of talipot palm ( *Corypha umbraculifera* L .) starch : a stem starch. *Radiation Physics and Chemistry*, 201, 110459. <https://doi.org/10.1016/j.radphyschem.2022.110459>
9. Sudheesh, C., Sunooj, K. V., Aaliya, B., Navaf, M., Akhila, P. P., Ahmad, S., Sabu, S., Sasidharan, A., Sudheer, K. P., Sinha, S. K., Sajeevkumar, V. A., & George, J. (2023). Effect of energetic neutrals on the kithul starch retrogradation ; Potential utilization for improving mechanical and barrier properties of films. *Food Chemistry*, 398, 133881. <https://doi.org/10.1016/j.foodchem.2022.133881>
